# Supplementary material for: Native doublet microtubules from Tetrahymena thermophila reveal the importance of outer junction proteins
Source: PubMed Central journal article supplement (PMC10105768; doi:10.1038/s41467-023-37868-0), 2023-04-15
Supplement: 41467_2023_37868_MOESM1_ESM.pdf [file 41467_2023_37868_MOESM1_ESM.pdf]

## Supplementary Figures

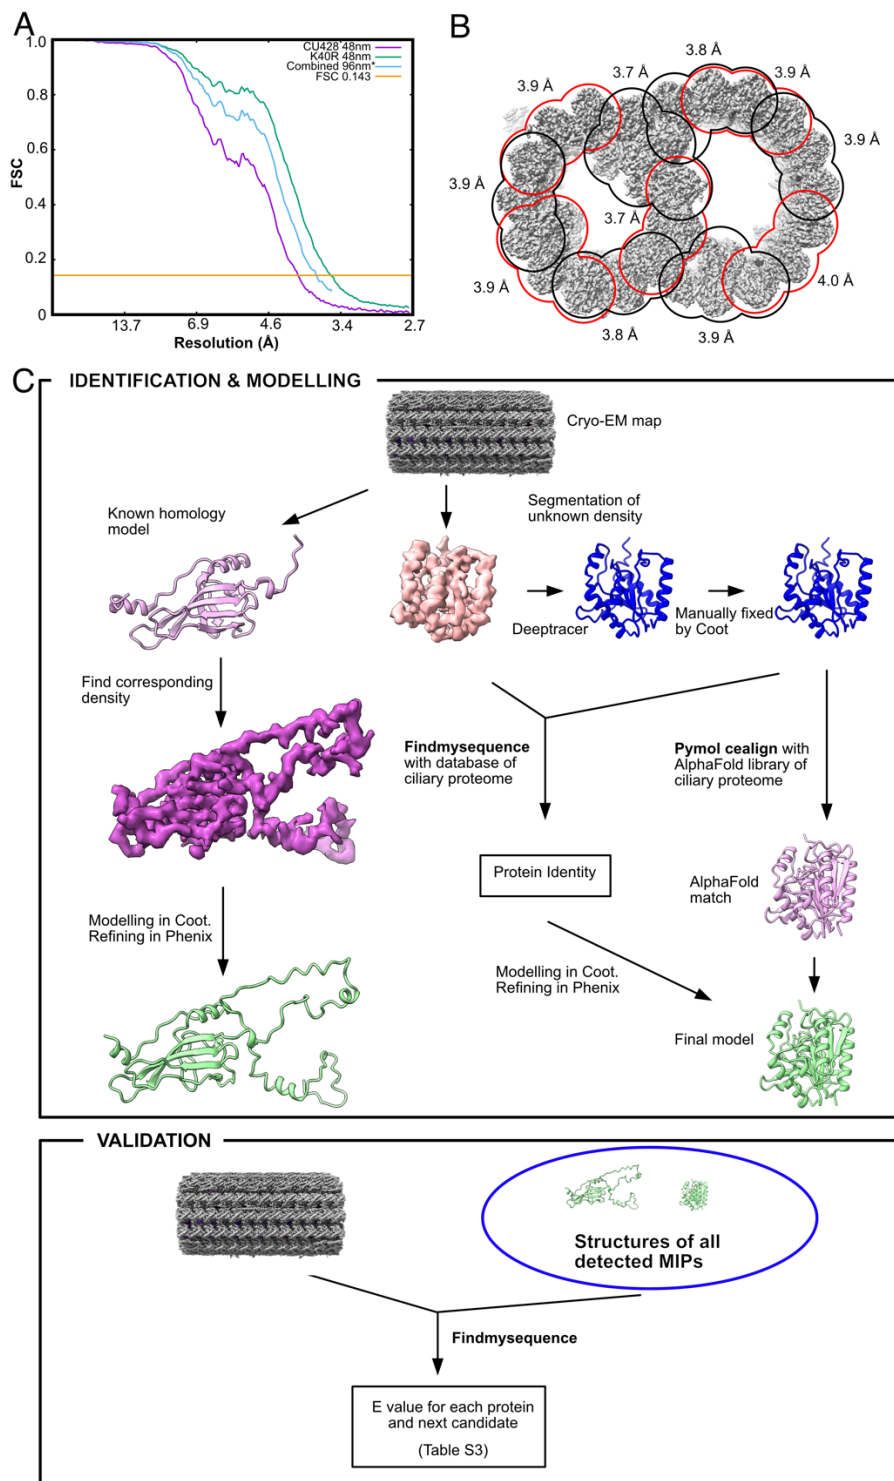

**Supplementary Figure 1: Cryo-EM, modelling and validation.** (A) Fourier Shell Correlation curves of the 48nm repeat maps of *WT* (*CU428*), *K40R* DMT and the 96-nm repeat map (both *CU428* and *K40R*) of the DMT. (B) The rough outline of masks used for local refinement of the DMT. A group of 2-3 PFs were contained in a mask (red or black outline) for focus-refinement. The resolutions of each group were noted next to the outline of the masks. (C) Strategy for the identification and modelling of proteins in the map (top). Strategy for the validation of the MIPs protein. See also Supplementary Table 4 for more information of validation.

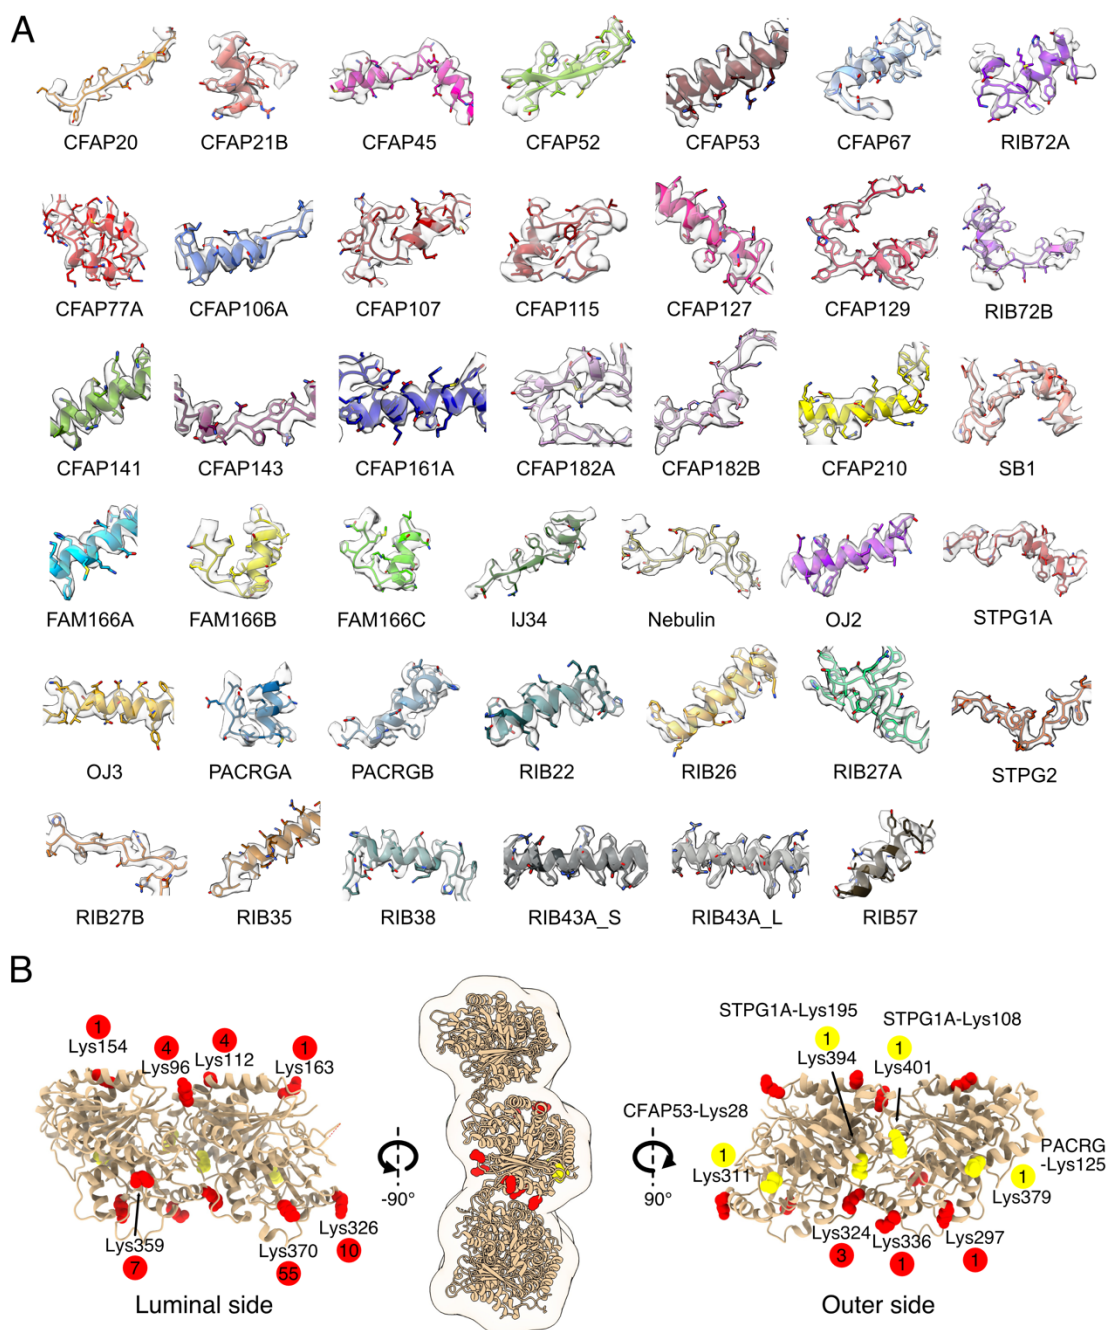

**Supplementary Figure 2: Visualization of side-chain densities of MIPs and cross-links with tubulin.**

(A) Examples of cryo-EM maps and the respective atomic models of all *Tetrahymena* MIPs modeled in this study. (B) Mapping of mass spectrometry crosslinks from MIPs to corresponding tubulin residues. The numbers in the circle mean the number of crosslinks found from MIPs to the tubulin residues. While the four residues with crosslinks on the outer surface of tubulins (yellow) are linked to the outer domain of STPG1A, PACRGA and CFAP53, the rest of the crosslinks are strictly located to the luminal or the lateral regions.

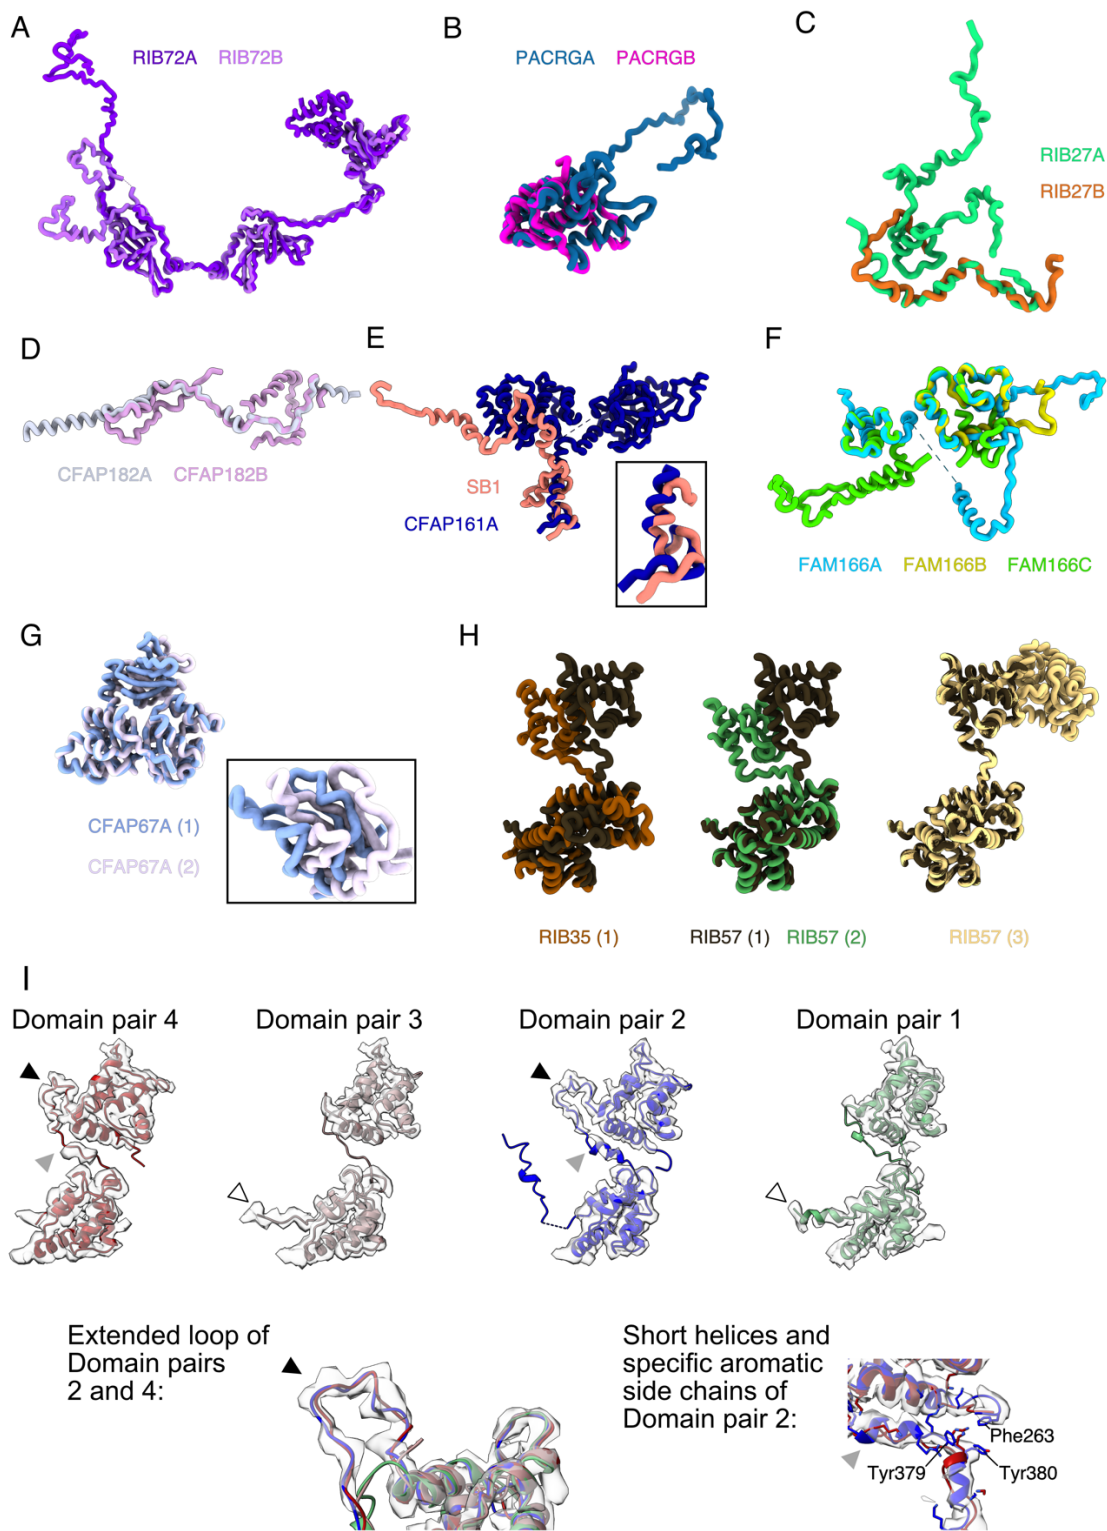

**Supplementary Figure 3: Paralogs and unique conformations of *Tetrahymena* MIPs.** (A-H) Structural comparisons of paralogs and unique conformations of *Tetrahymena* MIPs. (A) RIB72A and RIB72B. (B) PACRGA and PACRGB. (C) RIB27A and RIB27B. (D) CFAP182A and CFAP182B. (E) SB1 and CFAP161A. (F) FAM166A, FAM166B, and FAM166C. (G) CFAP67 repeats 1 and 2. (H) The EF-hand of repeat 1 of RIB57 is aligned with repeats 2 and 3, as well as with RIB35. (I) CFAP115 EF-hand domain pairs 1 and 3 are similar to each other, as are EF-hand domain pairs 2 and 4. However a short central helix and nearby aromatic side chains are unique to EF-hand domain pair 2.



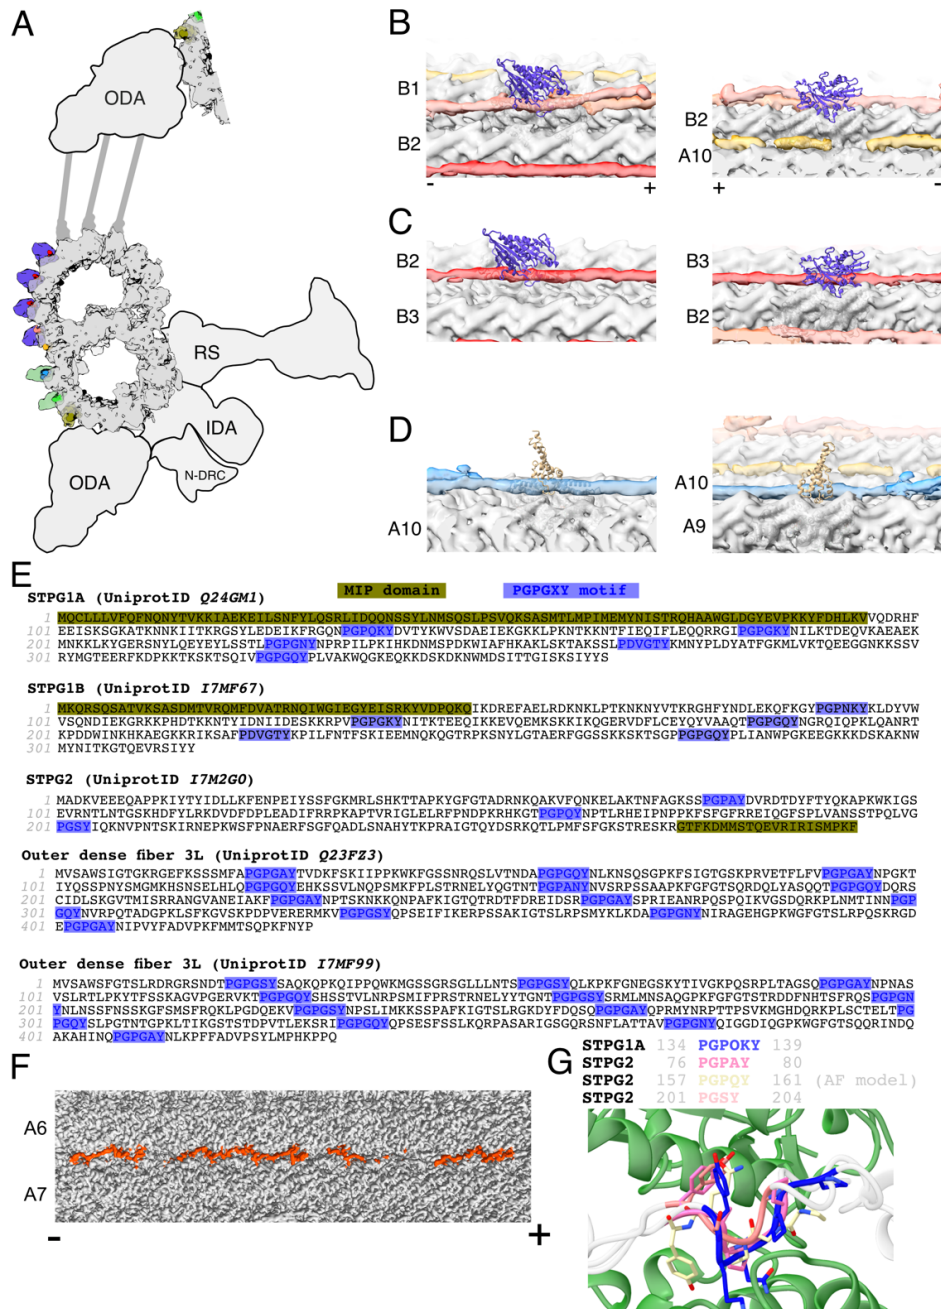

**Supplementary Figure 4: The outer surface filament presents steric clashes with dynein and kinesin.** (A) A cartoon of the DMT showing the putative regions for intraflagellar transport between A8-A10 and B1-B5. Violet densities: docking of kinesin microtubule-binding domain onto the B-tubule PFs, green densities: docking of dynein microtubule-binding domain onto the A8 and A9. ODA: Outer dynein arm; RS: Radial spoke; IDA: Inner dynein arm; N-DRC: Nexin-Dynein regulatory complex. (B-D) Docking of kinesin (PDB 6OJQ) on to the outer surface filament B1B2 (B) and B2B3 (C) showing a clear clash. (D) Docking of dynein-2 microtubule-binding domain (PDB 6RZB) onto the filament A9A10 showing the clear steric clash of microtubule-binding domain. (-) and (+) signs indicate the minus and plus ends of the microtubule respectively. (E) Amino acid sequences for STPG1A, STPG1B, STPG2, and two Outer dense fiber candidates. PG-rich repeat motifs (purple) and MIP domains (olive) are highlighted. (F) STPG2 is a filamentous protein that is woven between PFs A6-A7, present on the outer surface and the lumen. (G) PG-rich repeat motifs of STPG1A and STPG2 are structurally similar.

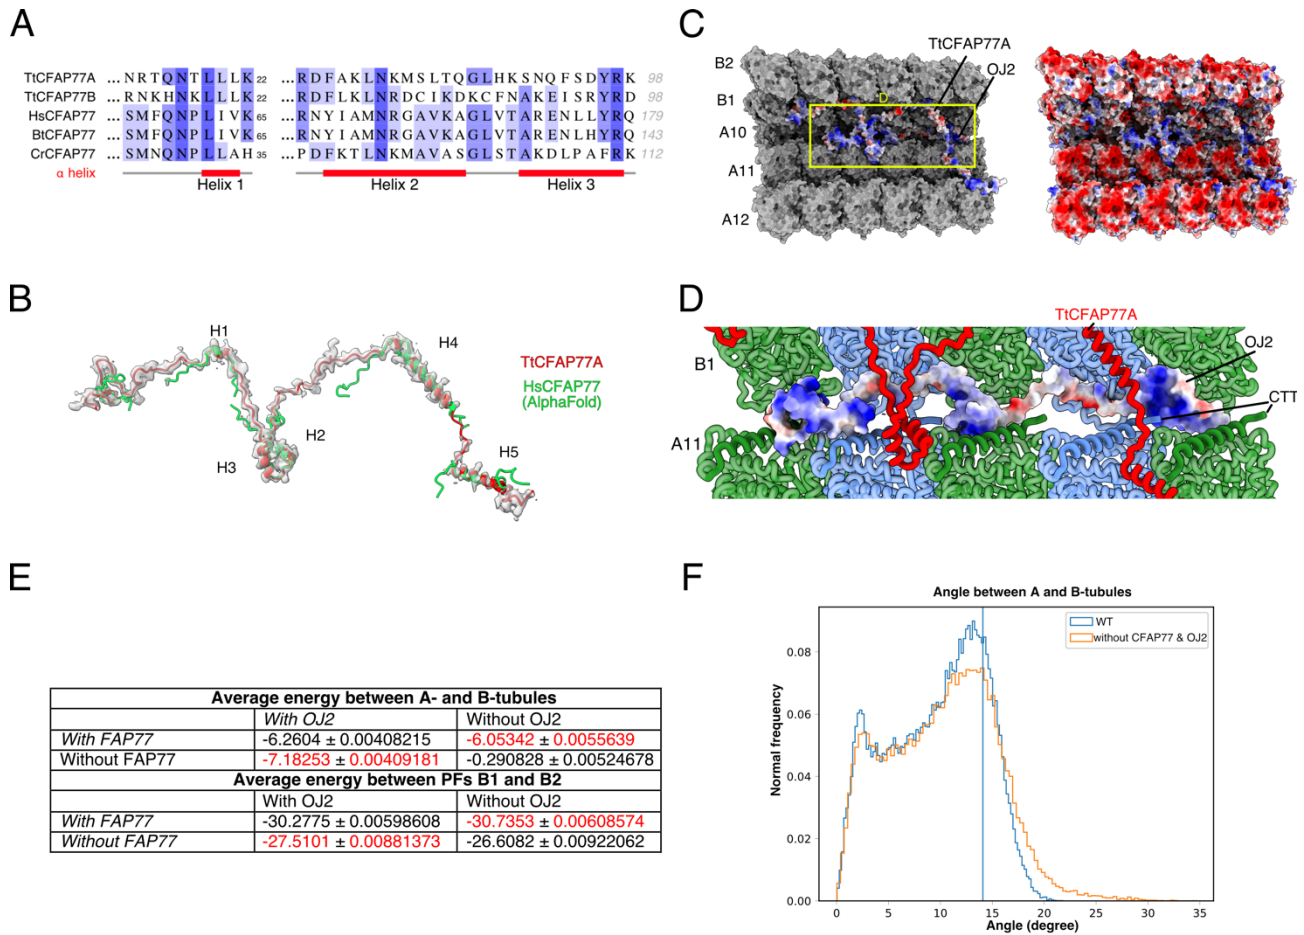

**Supplementary Figure 5: Conservation of CFAP77.** (A) Multiple sequence alignment of a segment of CFAP77. Human (Hs), bovine (Bt), and *Chlamydomonas* (Cr) sequences as well as two orthologs of *Tetrahymena* (Tt) were included. (B) Cryo-EM model of *Tetrahymena* TtCFAP77A. Folded regions of the AlphaFold2 model of human CFAP77 (green) were fitted into the map used to model the *Tetrahymena* protein. (C, D) Electrostatic potential of the outer junction proteins TtCFAP77 and OJ2 (C). Electropositive grooves of OJ2 are proximal to  $\beta$ -tubulin C-termini of PF A11 (D). (E) Stability of the outer junction in the presence and absence of CFAP77 and OJ2 based on coarse-grained molecular dynamics simulations. (F) Frequency of angular elasticity for A- and B-tubules from our MD simulations.

**A**

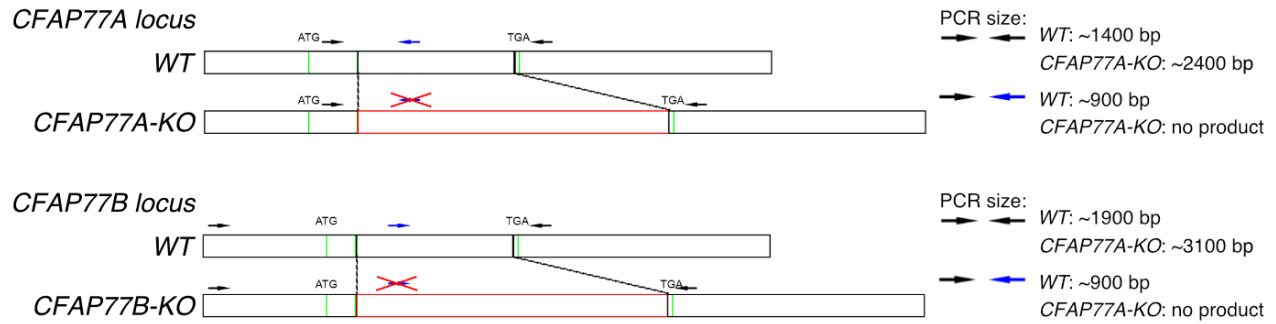

**B**

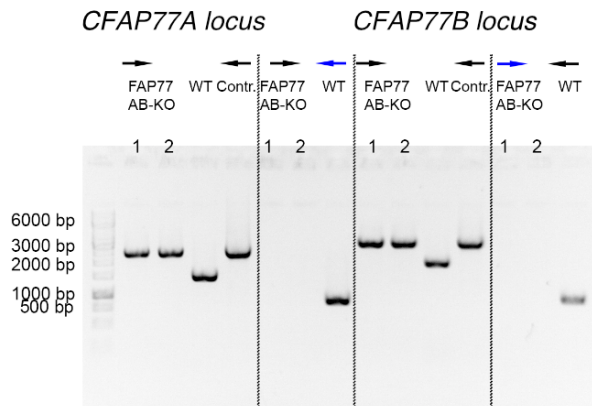

**C**

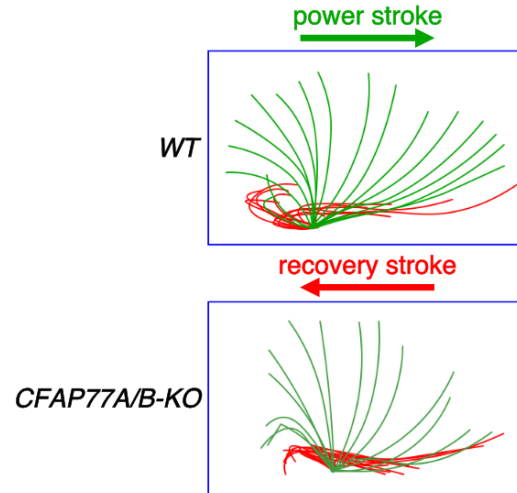

**D**

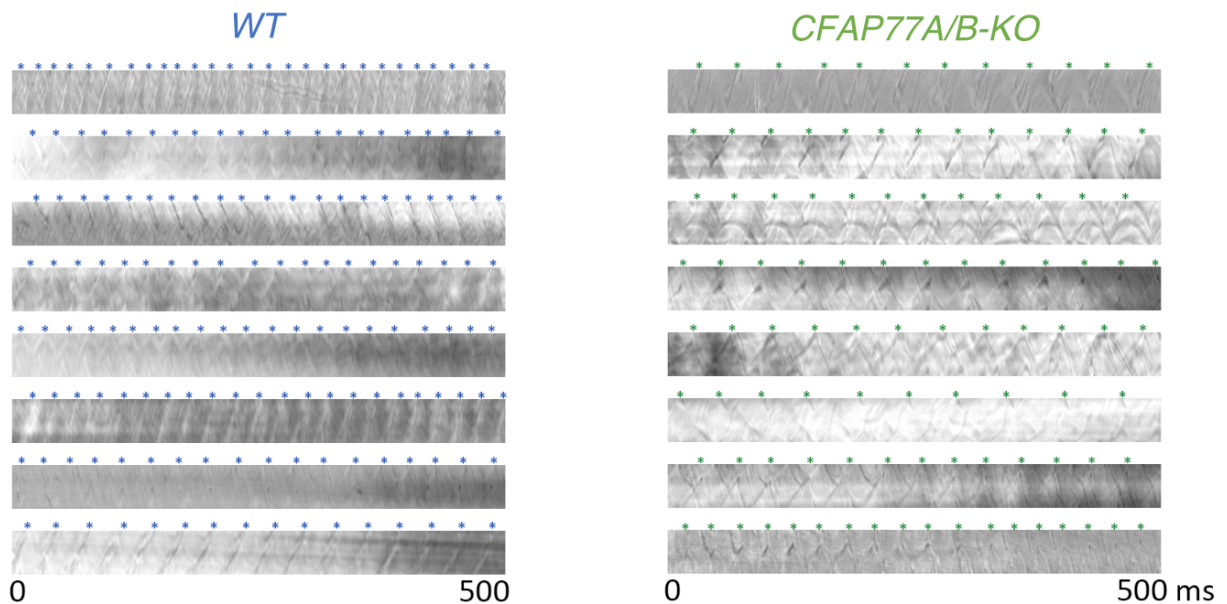

**Supplementary Figure 6: Deletion of two paralogs, CFAP77A and CFAP77B reduces cilia beating frequency.** (A) Homologous recombination methodology for *CFAP77A* and *CFAP77B* knockout strains. (B) PCR-based confirmation of the gene knockout. (C) Lack of both *CFAP77* paralogs does not apparently alter cilia beating amplitude and waveform. (D) Examples of kymographs of cilia motility, generated from each movie in ImageJ. Each wave peak (\*) on a kymograph corresponds to cilia passing through the drawn line. Source data are provided as a Source Data file for (B).

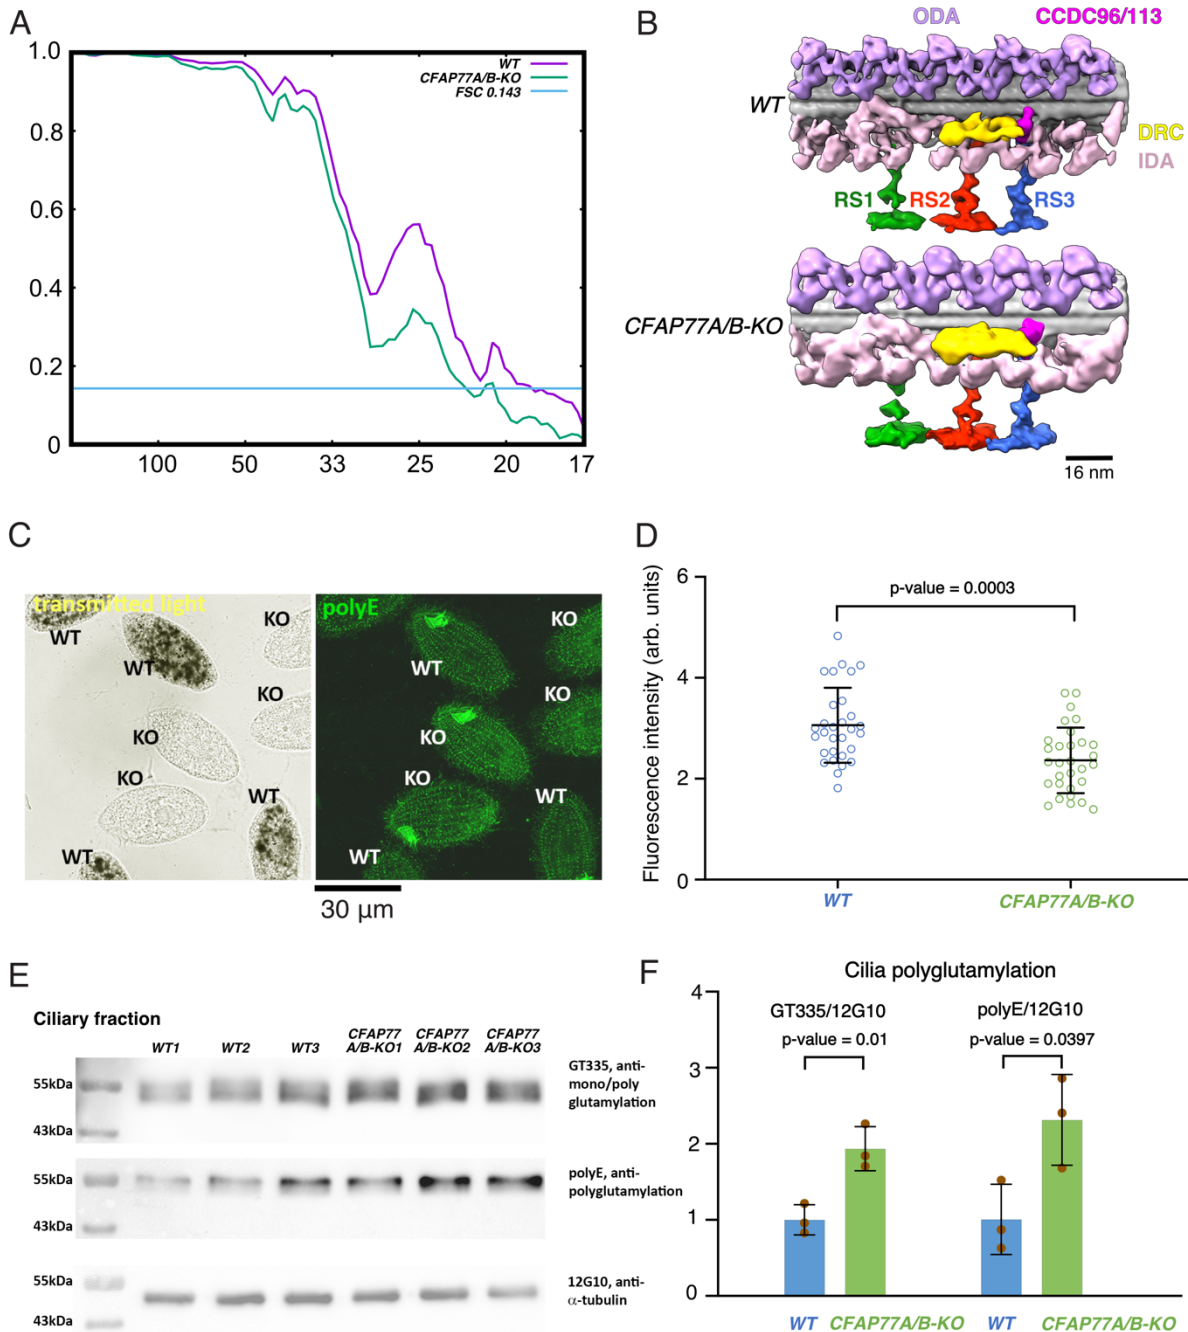

**Supplementary Figure 7: Cilia in the *CFAP77A/B-KO* mutant have a slightly higher level of tubulin glutamylation.** (A) Fourier Shell Correlation curves showing the determined resolution of *WT* (*CU-428*) and *CFAP77A/B-KO* 96-nm subtomogram averaged maps. (B) The 96-nm subtomogram averaged maps of *WT* (*CU-428*) and *CFAP77A/B-KO* show no abnormalities. (C) Phase-contrast (left) and immunofluorescence (right) of a mixed population of *WT* and *CFAP77A/B-KO* mutant cells stained with polyE antibodies detecting long glutamyl side chains (polyglutamylation). Note that *WT* cells were fed with India Ink and thus contain dark food vacuoles enabling their identification in the population of mixed cells. (D) Graph showing the corresponding quantitative immunofluorescence analyses of the average pixel intensity of axoneme region in mixed and processed side-by-side population of *WT* and mutant cells ( $n = 30$  cells for each *WT* and *CFAP77A/B-KO* from one experiment). Fluorescence intensity is measured in arbitrary units. (E, F) Western blot (E) and densitometric analyses (graph, F) of the levels of tubulin glutamylation of ciliary tubulin in *WT* and *CFAP77A/B-KO* cells. The level of

tubulin was shown using anti- $\alpha$ -tubulin 12G10 antibodies, and levels of tubulin glutamylation were detected using GT335 (left) or polyE antibodies (right) ( $n = 3$  biological replicates for WT and *CFAP77A/B-KO*). Data are presented as mean values  $\pm$  standard deviation in (D and F). Experiment is done one time for (C-F). Two-sided t-test was done for (D and F). Source data are provided as a Source Data file for (D-F).



## Supplementary Tables

**Supplementary Table 1:** Conserved MIPs in *Tetrahymena*, *Chlamydomonas* and Bovine cilia. (\*: proteins not modelled in this study; IJ: Inner junction, OJ: Outer junction, Ribbon: PFs A10-A13).

| Region   | <i>Tetrahymena</i> | <i>Chlamydomonas</i> | Bovine  | Reference (cilia) | Reference (MIP)           |
|----------|--------------------|----------------------|---------|-------------------|---------------------------|
| A-tubule | TtFAM166A          | -                    | FAM166A | <sup>1</sup>      | <sup>2</sup> , this study |
| A-tubule | TtFAM166B          | -                    | FAM166B | <sup>3</sup>      | <sup>4</sup>              |
| A-tubule | TtFAM166C          | -                    | FAM166C | <sup>5</sup>      | <sup>5</sup>              |
| A-tubule | TtCFAP21A          | FAP21                | CFAP21  | <sup>6</sup>      | <sup>6</sup>              |
| A-tubule | TtCFAP21B*         |                      |         |                   |                           |
| A-tubule | TtCFAP53           | FAP53                | CFAP53  | <sup>6</sup>      | <sup>7</sup>              |
| A-tubule | TtCFAP67           | FAP67                | NME7    | <sup>6</sup>      | <sup>7</sup>              |
| A-tubule | -                  | FAP68                | CFAP68  | <sup>6</sup>      | <sup>7</sup>              |
| A-tubule | TtCFAP115          | FAP115               |         | <sup>6</sup>      | <sup>7</sup>              |
| A-tubule | TtCFAP127          | FAP127               | MNS1    | <sup>6</sup>      | <sup>7</sup>              |
| A-tubule | TtCFAP129          | FAP129               |         | <sup>6</sup>      | <sup>7</sup>              |
| A-tubule | TtCFAP182A         | FAP182               | PIERCE1 | <sup>6</sup>      | <sup>7</sup>              |
| A-tubule | TtCFAP182B         |                      | PIERCE2 |                   |                           |
| B-tubule | TtCFAP45           | FAP45                | CFAP45  | <sup>6</sup>      | <sup>8</sup>              |
| B-tubule | -                  | FAP90                | CFAP90  | <sup>6</sup>      | <sup>7</sup>              |
| B-tubule | TtCFAP112A         | FAP112               |         | <sup>6</sup>      | <sup>7</sup>              |
| B-tubule | TtCFAP112B*        |                      |         |                   |                           |
| B-tubule | -                  | FAP144               | FAM183A | <sup>6</sup>      | <sup>5</sup>              |
| B-tubule | TtCFAP210          | FAP210               | CFAP210 | <sup>6</sup>      | <sup>7</sup>              |
| IJ       | TtCFAP20           | FAP20                | CFAP20  | <sup>6</sup>      | <sup>9</sup>              |
| IJ       | TtCFAP52A          | FAP52                | CFAP52  | <sup>6</sup>      | <sup>8</sup>              |
| IJ       | TtCFAP52B*         |                      |         |                   |                           |
| IJ       | TtCFAP52C*         |                      |         |                   |                           |
| IJ       | -                  | FAP126               | FLTP    | <sup>6</sup>      | <sup>7</sup>              |
| IJ       | -                  | FAP276               | CFAP276 | <sup>7</sup>      | <sup>7</sup>              |
| IJ       | TtPACRGA           | PACRG                | PACRG   | <sup>10</sup>     | <sup>11</sup>             |
| IJ       | TtPACRGB           |                      |         |                   |                           |
| IJ       | TtPACRGC*          |                      |         |                   |                           |
| OJ       | TtCFAP77A          | FAP77                | CFAP77  | <sup>6</sup>      | <sup>5</sup>              |
| OJ       | TtCFAP77B*         |                      |         |                   |                           |
| Ribbon   | -                  | FAP95                | CFAP95  | <sup>6</sup>      | <sup>7</sup>              |
| Ribbon   | TtCFAP106A         | FAP106               | ENKUR   | <sup>6</sup>      | <sup>7</sup>              |
| Ribbon   | TtCFAP106B*        |                      |         |                   |                           |
| Ribbon   | TtCFAP106C*        |                      |         |                   |                           |
| Ribbon   | TtCFAP107          | FAP107               | CFAP107 | <sup>6</sup>      | <sup>7</sup>              |
| Ribbon   | TtCFAP141          | FAP141               | CFAP141 | <sup>6</sup>      | <sup>7</sup>              |
| Ribbon   | TtCFAP143          | FAP143               | SPAG8   | <sup>6</sup>      | <sup>7</sup>              |
| Ribbon   | TtCFAP161A         | FAP161               | CFAP161 | <sup>6</sup>      | <sup>7</sup>              |
| Ribbon   | TtCFAP161B*        |                      |         |                   |                           |

|        |            |        |       |       |    |
|--------|------------|--------|-------|-------|----|
| Ribbon | TtRIB43a_S | RIB43a | RIBC2 | 12    | 13 |
| Ribbon | TtRIB43a_L |        |       |       |    |
| Ribbon | TtRIB72A   | RIB72  | EFHC1 | 14,15 | 16 |
|        | TtRIB72B   |        | EFHC2 |       |    |

**Supplementary Table 2:** Species-specific MIPs in *Tetrahymena*, *Chlamydomonas* and Bovine cilia.

| <b>Tetrahymena</b> | <b>Reference (cilia)</b> | <b>Chlamydomonas</b> | <b>Reference (cilia)</b> | <b>Bovine</b> | <b>Reference (cilia)</b> |
|--------------------|--------------------------|----------------------|--------------------------|---------------|--------------------------|
| TtB3B4_fMIP        | This study               | FAP68                | 6                        | EFCAB6        | 4,17                     |
| TtB4B5_fMIP        | This study               | FAP85                | 18                       | TEKTIN 1      | 4,19,20                  |
| TtB5B6_fMIP        | This study               | FAP90                | 6                        | TEKTIN 2      | 4,19,20                  |
| TtIJ34             | This study               | FAP166               | 6                        | TEKTIN 3      | 4,19,20                  |
| TtOJ2              | This study               | FAP222               | 6                        | TEKTIN 4      | 4,19,20                  |
| TtOJ3              | This study               | FAP252               | 6,21                     | TEKTIP1       | 4                        |
| TtRIB22            | This study               | FAP273               | 22                       |               |                          |
| TtRIB26            | This study               | FAP363               | 7                        |               |                          |
| TtRIB27A           | This study               | RIB21                | 7                        |               |                          |
| TtRIB27B           | This study               | RIB30                | 7                        |               |                          |
| TtRIB35            | This study               |                      |                          |               |                          |
| TtRIB38            | This study               |                      |                          |               |                          |
| TtRIB57            | This study               |                      |                          |               |                          |
| SB1                | This study               |                      |                          |               |                          |
| STPG1A             | This study               |                      |                          |               |                          |
| STPG1B             | This study               |                      |                          |               |                          |
| STPG2              | This study               |                      |                          |               |                          |
| Nebulin            | This study               |                      |                          |               |                          |

**Supplementary Table 3:** UniProt ID and Gene name of the *Tetrahymena* MIPs in this study. (\*: the proteins are found from mass spectrometry of *K40R*, *RIB72A/B* and *RIB72B-KO* mutants).

| MIP                  | UniProt ID | Gene name        | emPAI score |
|----------------------|------------|------------------|-------------|
| CFAP20               | Q22NU3     | TTHERM_00418580  | 20.72       |
| CFAP21A              | I7MK20     | TTHERM_00340080  | 0.66        |
| CFAP21B              | I7MLS4     | TTHERM_00494280  | 3.03        |
| CFAP45               | W7XCX2     | TTHERM_001164064 | 3.51        |
| CFAP52A              | Q22ZH2     | TTHERM_01094880  | 14.66       |
| CFAP52B              | I7MJ23     | TTHERM_00836640  | 1.78        |
| CFAP52C              | Q24C92     | TTHERM_00695800  | 1.44        |
| CFAP53               | Q23YQ8     | TTHERM_01207630  | 3.53        |
| CFAP67               | W7XGD1     | TTHERM_000372529 | 5.00        |
| CFAP77A              | Q22WR6     | TTHERM_00974270  | 4.87        |
| CFAP77B              | Q239Q2     | TTHERM_01190430  | 2.31        |
| CFAP106A             | I7M279     | TTHERM_00137550  | 6.18        |
| CFAP106B             | I7LU20     | TTHERM_00370750  | 3.67        |
| CFAP106C             | Q238Q9     | TTHERM_00454070  | 0.13        |
| CFAP107              | Q237T1     | TTHERM_00320040  | 0.98        |
| CFAP112A (B3B4 fMIP) | Q23A15     | TTHERM_00884620  | 1.86        |
| CFAP112B (B5B6 fMIP) | I7MEK6     | TTHERM_00192030  | 2.79        |
| CFAP115              | Q23KF9     | TTHERM_00193760  | 14.13       |
| CFAP127              | I7LV70     | TTHERM_00338110  | 3.66        |
| CFAP129              | I7M9I4     | TTHERM_00565590  | 9.30        |
| CFAP141              | A4VCU8     | TTHERM_00242188  | 0.41        |
| CFAP143              | A4VD56     | TTHERM_00502359  | 5.78        |
| CFAP161A             | Q22WJ6     | TTHERM_00155380  | 4.43        |
| CFAP161B             | I7M8Z8     | TTHERM_00219350  | 4.73        |
| CFAP182A             | Q24BV4     | TTHERM_01049330  | 4.20        |
| CFAP182B             | I7MLW3     | TTHERM_00535210  | *           |
| CFAP210              | Q23EX8     | TTHERM_00643530  | 2.73        |
| FAM166A              | Q238X3     | TTHERM_00449470  | 32.46       |
| FAM166B              | Q235M9     | TTHERM_01052990  | 6.31        |
| FAM166C              | Q22B75     | TTHERM_01109800  | 3.15        |
| IJ34                 | I7M9T0     | TTHERM_00348390  | 5.50        |
| Nebulin              | Q231B6     | TTHERM_00433410  | 1.12        |
| OJ2                  | Q236L2     | TTHERM_00086850  | 10.66       |
| OJ3                  | Unknown    | Unknown          | -           |
| PACRGA               | I7MLV6     | TTHERM_00446290  | 19.16       |
| PACRGB               | I7M317     | TTHERM_00499570  | 30.24       |
| PACRGC               | I7M312     | TTHERM_00499310  | *           |
| RIB22                | I7LT67     | TTHERM_00691900  | 6.14        |
| RIB26                | Q232I6     | TTHERM_00594110  | 2.33        |
| RIB27A (Tex36A)      | I7LUL4     | TTHERM_00522810  | 3.01        |
| RIB27B               | Q22CT6     | TTHERM_01016050  | 7.95        |
| RIB35                | I7ME81     | TTHERM_00267880  | 12.44       |
| RIB38 (Tex36B)       | Q23JL9     | TTHERM_00758860  | 7.92        |
| RIB43A L             | Q240R7     | TTHERM_00624660  | 1.69        |
| RIB43A S             | A4VDZ5     | TTHERM_00641119  | 4.29        |
| RIB57                | I7ME23     | TTHERM_00406590  | 26.04       |
| RIB72A               | I7M0S7     | TTHERM_00143690  | 13.16       |
| RIB72B               | I7MCU1     | TTHERM_00584850  | 12.40       |
| SB1 (Seam Binding 1) | Q231B2     | TTHERM_00433450  | 3.08        |
| STPG1A               | Q24GM1     | TTHERM_00724700  | 2.19        |
| STPG1B               | I7MF67     | TTHERM_00134870  | 1.05        |
| STPG2                | I7M2G0     | TTHERM_00218910  | 4.82        |



**Supplementary Table 4:** Identification of *Tetrahymena* proteins based on side chain fitting of our cryo-EM map. The E-value is reported from *FindMySequence* search of C-alpha backbone against the *K40R* cryo-EM map with proteins in the cilium.

| MIP                     | UniProt ID | E-value   | 2 <sup>nd</sup> match | E-value (2 <sup>nd</sup> ) | 3 <sup>rd</sup> match | E-value (3 <sup>rd</sup> ) |
|-------------------------|------------|-----------|-----------------------|----------------------------|-----------------------|----------------------------|
| CFAP20                  | Q22NU3     | 2.60E-52  | Q22SL3                | 6.70E-03                   |                       |                            |
| CFAP21B                 | I7MLS4     | 6.30E-80  | I7MK20<br>(CFAP21A)   | 7.90E-05                   |                       |                            |
| CFAP45                  | W7XCX2     | 7.10E-10  |                       |                            |                       |                            |
| CFAP52A                 | Q22ZH2     | 8.40E-164 | I7MJ23<br>(CFAP52B)   | 7.10E-21                   | Q24C92<br>(CFAP52C)   | 4.00E-13                   |
| CFAP53                  | Q23YQ8     | 3.00E-60  | A4VD76                | 1.20E-01                   |                       |                            |
| CFAP67                  | W7XGD1     | 5.20E-126 | I7M7Q3                | 2.10E-85                   | Q23U54                | 6.00E-09                   |
| CFAP77A                 | Q22WR6     | 4.90E-31  | Q239Q2<br>(CFAP77B)   | 6.30E-21                   |                       |                            |
| CFAP106A                | I7M279     | 5.20E-53  | I7LU20<br>(CFAP106B)  | 4.60E-23                   | Q238Q9<br>(CFAP106C)  | 7.30E-21                   |
| CFAP107                 | Q237T1     | 7.50E-20  |                       |                            |                       |                            |
| CFAP112A<br>(B3B4 fMIP) | Q23A15     | 1.70E-06  |                       |                            |                       |                            |
| CFAP112B<br>(B5B6 fMIP) | I7MEK6     | 8.20E-06  |                       |                            |                       |                            |
| CFAP115                 | Q23KF9     | 9.20E-105 | W7XC24                | 1.40E-04                   |                       |                            |
| CFAP127                 | I7LV70     | 1.40E-37  |                       |                            |                       |                            |
| CFAP129                 | I7M9I4     | 1.40E-18  |                       |                            |                       |                            |
| CFAP141                 | A4VCU8     | 2.70E-27  |                       |                            |                       |                            |
| CFAP143                 | A4VD56     | 1.70E-39  |                       |                            |                       |                            |
| CFAP161A                | Q22WJ6     | 3.40E-95  | I7M8Z8<br>(CFAP161B)  | 5.10E-41                   | I7ME23 (RIB57)        | 1.60E-06                   |
| CFAP182A                | Q24BV4     | 1.80E-17  |                       |                            |                       |                            |
| CFAP182B                | I7MLW3     | 6.90E-20  |                       |                            |                       |                            |
| CFAP210                 | Q23EX8     | 2.10E-22  | W7XDG5                | 2.10E-03                   | Q22GH8                | 2.20E-02                   |
| FAM166A                 | Q238X3     | 6.80E-21  | Q235M9<br>(FAM166B)   | 4.70E-05                   |                       |                            |
| FAM166B                 | Q235M9     | 1.90E-20  | Q238X3<br>(FAM166A)   | 1.20E-06                   |                       |                            |
| FAM166C                 | Q22B75     | 1.10E-43  | Q238X3<br>(FAM166A)   | 1.70E-01                   |                       |                            |
| IJ34                    | I7M9T0     | 1.50E-95  |                       |                            |                       |                            |
| Nebulin                 | Q231B6     | 4.50E-06  |                       |                            |                       |                            |
| OJ2                     | Q236L2     | 1.90E-37  | I7MAL9                | 5.70E-14                   | Q24DL2                | 5.50E-11                   |
| PACRGA                  | I7MLV6     | 5.10E-72  | I7M312<br>(PACRGC)    | 3.10E-49                   |                       |                            |
| PACRGB                  | I7M317     | 3.80E-57  | I7MLV6<br>(PACRGA)    | 2.10E-39                   |                       |                            |
| RIB22                   | I7LT67     | 3.80E-54  | I7ME23<br>(RIB57)     | 1.20E-10                   | I7M8Z8<br>(CFAP161B)  | 5.00E-10                   |
| RIB26                   | Q232I6     | 2.20E-83  |                       |                            |                       |                            |
| RIB27A                  | I7LUL4     | 7.40E-23  | Q22CT6<br>(RIB27B)    | 5.10E-11                   | Q22B75<br>(FAM166C)   | 1.10E-01                   |
| RIB27B                  | Q22CT6     | 1.30E-04  | I7LUL4<br>(RIB27)     | 1.40E-02                   |                       |                            |
| RIB35                   | I7ME81     | 1.20E-73  | I7LT67 (RIB22)        | 1.60E-09                   | I7M8Z8<br>(CFAP161B)  | 9.60E-09                   |

|                       |        |           |                      |          |                      |          |
|-----------------------|--------|-----------|----------------------|----------|----------------------|----------|
| RIB38/Tex36B          | Q23JL9 | 1.00E-76  | Q233Y0               | 4.80E-25 |                      |          |
| RIB43A S              | A4VDZ5 | 9.50E-41  | Q240R7<br>(RIB43A L) | 8.50E-08 |                      |          |
| RIB43A L              | Q240R7 | 3.30E-64  | A4VDZ5<br>(RIB43A S) | 3.60E-04 | W7XC77<br>(PG-rich)  | 4.00E-04 |
| RIB57                 | I7ME23 | 1.30E-127 | I7LT67 (RIB22)       | 5.50E-08 | I7M8Z8<br>(CFAP161B) | 9.80E-07 |
| RIB72A                | I7M0S7 | 1.10E-204 | I7MCU1<br>(RIB72B)   | 2.30E-50 |                      |          |
| RIB72B                | I7MCU1 | 3.00E-164 | I7M0S7<br>(RIB72A)   | 6.00E-53 |                      |          |
| SB1<br>(SeamBinding1) | Q231B2 | 3.90E-31  |                      |          |                      |          |
| STPG1A                | Q24GM1 | 2.80E-28  | I7MF67<br>(STPG1B)   | 7.60E-17 |                      |          |
| STPG2                 | I7M2G0 | 6.70E-16  |                      |          |                      |          |

**Supplementary Table 5:** *In situ* crosslinks between MIPs and tubulins in *Tetrahymena*.

| Protein 1 | AA Number | Protein 2 | AA Number | Protein 1 | AA Number | Protein 2        | AA Number |
|-----------|-----------|-----------|-----------|-----------|-----------|------------------|-----------|
| TUBA      | 370       | CFAP45    | 422       | TUBA      | 370       | NEBULIN          | 449       |
| TUBA      | 370       | CFAP45    | 364       | TUBA      | 370       | NEBULIN          | 436       |
| TUBA      | 370       | CFAP45    | 308       | TUBA      | 370       | FAM166A          | 196       |
| TUBA      | 370       | CFAP45    | 209       | TUBA      | 96        | RIB27A/TEX36A    | 228       |
| TUBA      | 370       | CFAP45    | 429       | TUBA      | 326       | IJ34             | 114       |
| TUBA      | 370       | CFAP45    | 314       | TUBA      | 326       | STPG2            | 276       |
| TUBA      | 370       | CFAP115   | 544       | TUBA      | 326       | STPG2            | 151       |
| TUBA      | 370       | CFAP115   | 492       | TUBA      | 326       | STPG2            | 154       |
| TUBA      | 370       | CFAP115   | 910       | TUBA      | 370       | CFAP143          | 49        |
| TUBA      | 326       | CFAP161A  | 253       | TUBA      | 370       | CFAP143          | 47        |
| TUBA      | 326       | CFAP53    | 314       | TUBA      | 370       | RIB38/Tex36B     | 223       |
| TUBA      | 311       | CFAP53    | 28        | TUBA      | 370       | RIB38/Tex36B     | 35        |
| TUBA      | 370       | CFAP53    | 370       | TUBA      | 96        | CFAP21A          | 184       |
| TUBA      | 370       | CFAP210   | 278       | TUBA      | 370       | CFAP21A          | 7         |
| TUBA      | 370       | CFAP210   | 326       | TUBA      | 370       | CFAP107          | 161       |
| TUBA      | 370       | CFAP210   | 268       | TUBA      | 370       | CFAP107          | 146       |
| TUBA      | 370       | CFAP210   | 220       | TUBA      | 370       | CFAP107          | 114       |
| TUBA      | 370       | CFAP52    | 442       | TUBA      | 370       | CFAP21B          | 6         |
| TUBA      | 370       | CFAP52    | 183       | TUBA      | 401       | STPG1A           | 108       |
| TUBA      | 370       | CFAP112B  | 451       | TUBA      | 96        | STPG1A           | 296       |
| TUBA      | 370       | CFAP112B  | 297       | TUBA      | 394       | STPG1A           | 195       |
| TUBA      | 370       | CFAP112B  | 287       | TUBA      | 112       | STPG1A           | 296       |
| TUBA      | 112       | CFAP106A  | 150       | TUBA      | 96        | STPG1A           | 297       |
| TUBA      | 370       | CFAP112A  | 264       | TUBA      | 370       | FAM166C          | 209       |
| TUBA      | 370       | CFAP112A  | 428       | TUBA      | 370       | CFAP129          | 131       |
| TUBA      | 370       | CFAP112A  | 210       | TUBA      | 370       | SB1              | 98        |
| TUBA      | 370       | CFAP112A  | 369       | TUBA      | 326       | RIB27B           | 168       |
| TUBA      | 370       | CFAP112A  | 254       | TUBA      | 370       | RIB43a L         | 127       |
| TUBA      | 370       | CFAP112A  | 318       | TUBA      | 163       | PACRGB           | 86        |
| TUBA      | 370       | CFAP112A  | 475       | TUBA      | 326       | ODF3L-1 (I7MF99) | 330       |
| TUBA      | 112       | CFAP112A  | 13        | TUBA      | 326       | ODF3L-2 (Q23FZ3) | 322       |
| TUBA      | 112       | CFAP112A  | 5         | TUBA      | 326       | ODF3L-2 (Q23FZ3) | 367       |
| TUBA      | 370       | CFAP112A  | 380       | TUBA      | 326       | ODF3L-2 (Q23FZ3) | 397       |
| TUBA      | 370       | RIB57     | 22        | TUBA      | 326       | ODF3L-2 (Q23FZ3) | 80        |
| TUBA      | 370       | RIB57     | 253       | TUBB      | 359       | CFAP45           | 291       |
| TUBA      | 326       | RIB72B    | 239       | TUBB      | 359       | CFAP45           | 237       |
| TUBA      | 370       | RIB72B    | 223       | TUBB      | 359       | CFAP115          | 748       |
| TUBA      | 326       | RIB72B    | 401       | TUBB      | 359       | CFAP115          | 521       |
| TUBA      | 370       | RIB72B    | 23        | TUBB      | 297       | CFAP161A         | 253       |
| TUBA      | 326       | RIB72A    | 297       | TUBB      | 359       | CFAP53           | 302       |
| TUBA      | 370       | NEBULIN   | 12        | TUBB      | 359       | CFAP210          | 199       |
| TUBA      | 370       | NEBULIN   | 356       | TUBB      | 379       | PACRGA           | 125       |
| TUBA      | 370       | NEBULIN   | 403       | TUBB      | 154       | PACRGA           | 17        |
| TUBA      | 370       | NEBULIN   | 442       | TUBB      | 359       | RIB72B           | 219       |
| TUBA      | 370       | NEBULIN   | 148       | TUBB      | 324       | STPG1A           | 189       |
| TUBA      | 370       | NEBULIN   | 189       | TUBB      | 324       | CFAP129          | 254       |
| TUBA      | 370       | NEBULIN   | 60        | TUBB      | 324       | SB1              | 104       |
| TUBA      | 370       | NEBULIN   | 194       | TUBB      | 336       | PACRGB           | 38        |

**Supplementary Table 6:** Mass spectrometry analysis of wild type (WT), *RIB72B* and *RIB72A/B* knockout mutants showing the missing proteins. (Only proteins with quantitative value > 1 are shown). Source data are provided as a Source Data file.

| UniprotID                 | <i>WT (CU428)</i> |       |       | <i>RIB72B-KO</i> |       |       | <i>RIB72A/B-KO</i> |     |     |
|---------------------------|-------------------|-------|-------|------------------|-------|-------|--------------------|-----|-----|
|                           | S1                | S2    | S3    | S1               | S2    | S3    | S1                 | S2  | S3  |
| I7MCU1 ( <b>RIB72B</b> )  | 217.4             | 199.6 | 212.8 | 0.0              | 0.0   | 0.0   | 0.0                | 0.0 | 0.0 |
| I7M0S7 ( <b>RIB72A</b> )  | 172.9             | 189.0 | 181.7 | 246.0            | 245.9 | 242.0 | 0.0                | 0.0 | 0.0 |
| Q23KF9 ( <b>FAP115</b> )  | 300.3             | 313.5 | 297.0 | 294.5            | 281.9 | 281.9 | 0.0                | 0.0 | 0.0 |
| Q238X3 ( <b>FAM166C</b> ) | 101.3             | 102.4 | 115.2 | 84.5             | 89.0  | 102.7 | 0.0                | 0.0 | 0.0 |
| Q235M9 ( <b>FAM166B</b> ) | 35.8              | 34.4  | 44.3  | 33.8             | 39.2  | 38.8  | 0.0                | 0.0 | 0.0 |
| I7LT67 ( <b>RIB22</b> )   | 31.4              | 30.9  | 37.2  | 16.9             | 21.2  | 21.7  | 0.0                | 0.0 | 0.0 |
| I7LUL4 ( <b>RIB27A</b> )  | 28.8              | 20.3  | 31.9  | 13.7             | 27.6  | 30.8  | 0.0                | 0.0 | 0.0 |
| Q22CT6 ( <b>RIB27B</b> )  | 27.9              | 36.2  | 39.0  | 1.1              | 4.2   | 3.4   | 0.0                | 0.0 | 0.0 |
| W7XC77 (PG-rich)          | 13.1              | 11.5  | 16.0  | 7.4              | 8.5   | 12.6  | 0.0                | 0.0 | 0.0 |
| I7LV80                    | 10.5              | 12.4  | 9.8   | 0.0              | 0.0   | 1.1   | 0.0                | 0.0 | 0.0 |
| Q22TY0                    | 9.6               | 8.8   | 8.9   | 0.0              | 0.0   | 0.0   | 0.0                | 0.0 | 0.0 |
| I7LVP2                    | 8.7               | 11.5  | 9.8   | 0.0              | 1.1   | 2.3   | 0.0                | 0.0 | 0.0 |
| Q231F9                    | 5.2               | 1.8   | 7.1   | 1.1              | 0.0   | 1.1   | 0.0                | 0.0 | 0.0 |
| Q22CT4                    | 5.2               | 4.4   | 3.5   | 0.0              | 0.0   | 1.1   | 0.0                | 0.0 | 0.0 |
| I7M2F8                    | 2.6               | 4.4   | 2.7   | 0.0              | 41.3  | 3.4   | 0.0                | 0.0 | 0.0 |
| I7M6E1                    | 2.6               | 3.5   | 1.8   | 0.0              | 0.0   | 0.0   | 0.0                | 0.0 | 0.0 |
| Q22KN2                    | 1.7               | 2.6   | 1.8   | 0.0              | 0.0   | 0.0   | 0.0                | 0.0 | 0.0 |
| Q22HI8                    | 1.7               | 0.9   | 0.9   | 0.0              | 0.0   | 0.0   | 0.0                | 0.0 | 0.0 |
| I7MDS6                    | 1.7               | 0.9   | 1.8   | 0.0              | 0.0   | 0.0   | 0.0                | 0.0 | 0.0 |
| I7LWU5                    | 1.7               | 0.9   | 1.8   | 1.1              | 1.1   | 0.0   | 0.0                | 0.0 | 0.0 |
| Q22S92                    | 1.7               | 0.0   | 0.9   | 0.0              | 0.0   | 0.0   | 0.0                | 0.0 | 0.0 |



**Supplementary Table 7:** Primers used to engineer *Tetrahymena CFAP77* paralogs mutant cells. Sequence recognized by restriction endonuclease in bold, ATG or TGA are underlined.

| Name                                       | Sequence                                                       | Amplified fragments                                                                                                                 |
|--------------------------------------------|----------------------------------------------------------------|-------------------------------------------------------------------------------------------------------------------------------------|
| <b>CFAP77A-3HA native locus expression</b> |                                                                |                                                                                                                                     |
| CFAP77A-3HA-cod-MluI-F                     | AAAT <b>ACGCGT</b> T <u>ATG</u><br>TCAAGAACTAGCACCGG           | entire open reading frame (1.58 kb)                                                                                                 |
| CFAP77A-3HA-cod-BamHI-R                    | AAAT <b>GGATCC</b><br>CTCTACAGCTTGGTTAGGAACT                   |                                                                                                                                     |
| CFAP77A-3HA-3UTR-PstI-F                    | AAAT <b>CTGCAG</b><br>CTTTAGTGATTTGCCAGTTTAAAGATC              | 0.8 kb of a 3'UTR                                                                                                                   |
| CFAP77A-3HA-3UTR-XhoI-R                    | AAAT <b>CTCGAG</b> CATAACTCTTAATGAA<br>AATTGAGAGATAGTTTC       | transgene enabling expression of CFAP77A with C- tag in native locus                                                                |
| <b>CFAP77B-3HA native locus expression</b> |                                                                |                                                                                                                                     |
| CFAP77B-3HA-cod-MluI-F                     | AAAT <b>ACGCGT</b> T <u>ATG</u><br>AATTTGAGTTAAGAAGGAGTTCT     | entire open reading frame (1.26 kb)                                                                                                 |
| CFAP77B-3HA-cod-BamHI-R                    | AAAT <b>GGATCC</b> TGCAGCATGTTCTGA<br>GCTTTAATTAAGGAA          |                                                                                                                                     |
| CFAP77B-3HA-3UTR-PstI-F                    | AAAT <b>CTGCAG</b> AGAGTTATAATTCTTTG<br>TTACACTTCTACAG         | 0.6 kb of a 3'UTR                                                                                                                   |
| CFAP77B-3HA-3UTR-XhoI-R                    | AAAT <b>CTCGAG</b><br>TTATCAGCAATCATCTCTTCTCTCT                | transgene enabling expression of CFAP77B with C- tag in native locus                                                                |
| <b>CFAP77A-KO</b>                          |                                                                |                                                                                                                                     |
| CFAP77A-KO-5-F-ApaI                        | AATT <b>GGGCCC</b><br>AAGAATCTATTTATTGATTTAACCATC              | 1 kb fragment encompassing 0.5 kb of the 5'UTR and 0.5 kb of the open reading frame, upstream to the deleted gene fragment (1 kb)   |
| CFAP77A-KO-5-R-EcoRV-SmaI                  | AATT <b>CCCGGG</b> ATATCGGTATTTCCA<br>AGTCATGCTAACTATTTA       |                                                                                                                                     |
| CFAP77A-KO-3-F-PstI                        | AATT <b>CTGCAG</b><br>CTATGATGCTAACGAAGTTCCTAAC                | 1.4 kb fragment encompassing 37 bp of the open reading frame and 1.4 kb of 3'UTR downstream to the deleted gene fragment            |
| CFAP77A-KO-3-R-EcoRV-SacI                  | AATT <b>CCGCGG</b> ATATCTAGCTAAATATT<br>TTCTGGAAACTTAAATATCTAC |                                                                                                                                     |
| <b>CFAP77B-KO</b>                          |                                                                |                                                                                                                                     |
| CFAP77B-KO-5-F-ApaI                        | AATT <b>GGGCCC</b><br>TTTTGCAAGTATGAATACTACTTTTTTGTT           | 1 kb fragment encompassing 0.6 kb of the 5'UTR and 0.4 kb of the open reading frame, upstream to the deleted gene fragment (0.8 kb) |
| CFAP77B-KO-5-R-EcoRV-SmaI                  | AATT <b>CCCGGG</b> ATATCGCGATTGAGC<br>TTAAAAAATCTCTAG          |                                                                                                                                     |
| CFAP77B-KO-3-F-PstI                        | AATT <b>CTGCAG</b><br>TATTGTAAACGATTTCAA<br>GTTAGAAAGATTT      | 1.9 kb fragment encompassing 130 bp of the open reading frame and 1.77 kb of 3'UTR downstream to the deleted gene fragment          |
| CFAP77B-KO-3-R-EcoRV-SacI                  | AATT <b>CCGCGG</b><br>ATATCATGAATTAAGATTTGTTGCCATAG            |                                                                                                                                     |
| <b>KO verification</b>                     |                                                                |                                                                                                                                     |
| CFAP77A-KO-Check-F                         | AGCGAGAAGATTTATAGAATGAATTTT                                    | no PCR product in KO                                                                                                                |
| CFAP77A-KO-Check-R1                        | CCTATTCAATACGCTGTTAGAATTCTA                                    |                                                                                                                                     |
| CFAP77A-KO-Check-R2                        | AAAGGTGTTAGTTAGTTAGTTAGCTAG                                    |                                                                                                                                     |
| CFAP77B-KO-5-F-ApaI                        | AATT <b>GGGCCC</b><br>TTTTGCAAGTATGAATACTACTTTTTTGTT           | no PCR product in KO                                                                                                                |
| CFAP77B-KO-check-F                         | CAAATGCTTTAATGCGAAGGTAAC                                       |                                                                                                                                     |
| CFAP77B-KO-check-R                         | GGAACTCCTCTTAGCTGTGA                                           |                                                                                                                                     |

## Supplementary References

- 1 Lehti, M. S., Kotaja, N. & Sironen, A. KIF3A is essential for sperm tail formation and manchette function. *Mol Cell Endocrinol* **377**, 44-55 (2013). <https://doi.org/10.1016/j.mce.2013.06.030>
- 2 Leung, M. R. *et al.* Unraveling the intricate microtubule inner protein networks that reinforce mammalian sperm flagella. *bioRxiv* (2022).
- 3 Tu, F., Sedzinski, J., Ma, Y., Marcotte, E. M. & Wallingford, J. B. Protein localization screening in vivo reveals novel regulators of multiciliated cell development and function. *J Cell Sci* **131** (2018). <https://doi.org/10.1242/jcs.206565>
- 4 Gui, M. *et al.* De novo identification of mammalian ciliary motility proteins using cryo-EM. *Cell* **184**, 5791-5806.e5719 (2021). <https://doi.org/10.1016/j.cell.2021.10.007>
- 5 Gui, M. *et al.* SPACA9 is a luminal protein of human ciliary singlet and doublet microtubules. *Proc Natl Acad Sci U S A* **119**, e2207605119 (2022). <https://doi.org/10.1073/pnas.2207605119>
- 6 Pazour, G. J., Agrin, N., Leszyk, J. & Witman, G. B. Proteomic analysis of a eukaryotic cilium. *J Cell Biol* **170**, 103-113 (2005). <https://doi.org/10.1083/jcb.200504008>
- 7 Ma, M. *et al.* Structure of the Decorated Ciliary Doublet Microtubule. *Cell* **179**, 909-922 e912 (2019). <https://doi.org/10.1016/j.cell.2019.09.030>
- 8 Owa, M. *et al.* Inner lumen proteins stabilize doublet microtubules in cilia and flagella. *Nat Commun* **10**, 1143 (2019). <https://doi.org/10.1038/s41467-019-09051-x>
- 9 Yanagisawa, H. A. *et al.* FAP20 is an inner junction protein of doublet microtubules essential for both the planar asymmetrical waveform and stability of flagella in *Chlamydomonas*. *Mol Biol Cell* **25**, 1472-1483 (2014). <https://doi.org/10.1091/mbc.E13-08-0464>
- 10 Dawe, H. R., Farr, H., Portman, N., Shaw, M. K. & Gull, K. The Parkin co-regulated gene product, PACRG, is an evolutionarily conserved axonemal protein that functions in outer-doublet microtubule morphogenesis. *J Cell Sci* **118**, 5421-5430 (2005). <https://doi.org/10.1242/jcs.02659>
- 11 Dymek, E. E. *et al.* PACRG and FAP20 form the inner junction of axonemal doublet microtubules and regulate ciliary motility. *Mol Biol Cell* **30**, 1805-1816 (2019). <https://doi.org/10.1091/mbc.E19-01-0063>
- 12 Norrander, J. M., deCathelineau, A. M., Brown, J. A., Porter, M. E. & Linck, R. W. The Rib43a protein is associated with forming the specialized protofilament ribbons of flagellar microtubules in *Chlamydomonas*. *Mol Biol Cell* **11**, 201-215 (2000).
- 13 Ichikawa, M. *et al.* Tubulin lattice in cilia is in a stressed form regulated by microtubule inner proteins. *Proc Natl Acad Sci U S A* **116**, 19930-19938 (2019). <https://doi.org/10.1073/pnas.1911119116>
- 14 Ikeda, K. *et al.* Rib72, a conserved protein associated with the ribbon compartment of flagellar A-microtubules and potentially involved in the linkage between outer doublet microtubules. *J Biol Chem* **278**, 7725-7734 (2003). <https://doi.org/10.1074/jbc.M210751200>
- 15 Patel-King, R. S., Benashski, S. E. & King, S. M. A bipartite Ca<sup>2+</sup>-regulated nucleoside-diphosphate kinase system within the *Chlamydomonas* flagellum. The regulatory subunit p72. *J Biol Chem* **277**, 34271-34279 (2002). <https://doi.org/10.1074/jbc.M204137200>
- 16 Stoddard, D. *et al.* Tetrahymena RIB72A and RIB72B are microtubule inner proteins in the ciliary doublet microtubules. *Mol Biol Cell* **29**, 2566-2577 (2018). <https://doi.org/10.1091/mbc.E18-06-0405>
- 17 Patir, A. *et al.* The transcriptional signature associated with human motile cilia. *Sci Rep* **10**, 10814 (2020). <https://doi.org/10.1038/s41598-020-66453-4>
- 18 Kirima, J. & Oiwa, K. Flagellar-associated Protein FAP85 Is a Microtubule Inner Protein That Stabilizes Microtubules. *Cell Struct Funct* **43**, 1-14 (2018). <https://doi.org/10.1247/csf.17023>
- 19 Pirner, M. A. & Linck, R. W. Tektins are heterodimeric polymers in flagellar microtubules with axial periodicities matching the tubulin lattice. *J Biol Chem* **269**, 31800-31806 (1994).

- 20 Linck, R. W. Flagellar doublet microtubules: fractionation of minor components and alpha-tubulin from specific regions of the A-tubule. *J Cell Sci* **20**, 405-439 (1976).
- 21 Ikeda, K., Ikeda, T., Morikawa, K. & Kamiya, R. Axonemal localization of Chlamydomonas PACRG, a homologue of the human Parkin-coregulated gene product. *Cell Motil Cytoskeleton* **64**, 814-821 (2007). <https://doi.org:10.1002/cm.20225>
- 22 Bower, R. *et al.* DRC2/CCDC65 is a central hub for assembly of the nexin-dynein regulatory complex and other regulators of ciliary and flagellar motility. *Mol Biol Cell* **29**, 137-153 (2018). <https://doi.org:10.1091/mbc.E17-08-0510>
