# Supplementary material for: Native doublet microtubules from Tetrahymena thermophila reveal the importance of outer junction proteins
Source: PubMed Central journal article supplement (PMC10105768; doi:10.1038/s41467-023-37868-0), 2023-04-15
Supplement: 41467_2023_37868_MOESM3_ESM.pdf [file 41467_2023_37868_MOESM3_ESM.pdf]

## **Description of additional supplementary files**

**Supplementary Movie 1** : Highlighting the structure of the native DMT from Tetrahymena cilia.

**Supplementary Movie 2** : An overview of the outer junction of the DMT form Tetrahymena cilia and their interactions.
